1 **Title:** Monocarboxylate Transporter 1 (MCT1) mediates succinate export in the retina

2

3 **Authors:** Celia M. Bisbach<sup>1</sup>, Daniel T. Hass<sup>1</sup>, James B. Hurley<sup>1,2,3</sup>

4 <sup>1</sup>Department of Biochemistry, University of Washington, Seattle, WA 98195, USA

5 <sup>2</sup>Department of Ophthalmology, University of Washington, Seattle, WA 98195, USA

6 <sup>3</sup>corresponding author (jbhhh@uw.edu)

7

8 **Abstract:**

9 Purpose: Succinate is exported by the retina and imported by eyecup tissue. The  
10 transporter(s) mediating this process have not yet been identified. Recent studies  
11 showed that Monocarboxylate Transporter 1 (MCT1) can transport succinate across  
12 plasma membranes in cardiac and skeletal muscle. Retina and retinal pigment  
13 epithelium (RPE) both express multiple MCT isoforms including MCT1. We tested the  
14 hypothesis that MCTs facilitate retinal succinate export and RPE succinate import.

15 Methods: We assessed retinal succinate export and eyecup succinate import in short  
16 term *ex vivo* culture using gas chromatography-mass spectrometry. We test the  
17 dependence of succinate export and import on pH, proton ionophores, conventional  
18 MCT substrates, and the MCT inhibitors AZD3965, AR-C155858, and diclofenac.

19 Results: Succinate exits retinal tissue through MCT1 but does not enter RPE through  
20 MCT1 or any other MCT. Intracellular succinate levels are a contributing factor that  
21 determines if an MCT1-expressing tissue will export succinate.

22 Conclusions: MCT1 facilitates export of succinate from retinas. An unidentified, non-  
23 MCT transporter facilitates import of succinate into RPE.

24

25

## 26 **Introduction**

27

28 Succinate has a unique role in the eye. It is a valuable metabolic fuel, and evidence  
29 supports a model where succinate produced by fumarate respiration and exported from  
30 the retina is oxidized by the neighboring retinal pigment epithelium (RPE).<sup>1,2</sup> Succinate  
31 is also implicated in retinal pathology. In a model of O<sub>2</sub>-induced retinopathy, succinate  
32 accumulates in the retina and drives angiogenesis via SUCNR1 signaling on retinal  
33 ganglion cells.<sup>3</sup> SUCNR1-deficiency in mice promotes premature sub-retinal dystrophy,  
34 and SUCNR1 variants are associated with age-related macular degeneration in a  
35 human population.<sup>4</sup> Under both normal and pathological circumstances, succinate  
36 mediates its effects in a non-cell autonomous manner. However, the transporter used  
37 by succinate to exit or enter any ocular cell type has not yet been identified.

38

39 Monocarboxylate carrier 1 (MCT1) can facilitate succinate export in exercising muscle  
40 and ischemic heart.<sup>5,6</sup> Retinas express both MCT1 and MCT4, while RPE cells in  
41 eyecups express MCT1 and MCT3.<sup>7,8</sup> Based off this, we set out to test if MCT1 might  
42 also be responsible for facilitating retinal succinate export and/or RPE succinate import,  
43 and whether additional MCTs also transport succinate in the eye.

44

## 45 **Results**

46

### 47 **MCT1 mediates succinate export in retinas**

48

49 Succinate is an abundant metabolite in retinas. Retinas in short-term *ex vivo* culture  
50 export a molar amount of succinate equivalent to their entire intracellular succinate pool  
51 approximately every 40 minutes (**Figure 1A** and **Figure 1B**).<sup>1</sup> In order to evaluate the  
52 role of MCTs in retinal succinate export, MCT activity must be reduced. Retinas are  
53 exceptionally glycolytic, so reducing MCT activity could block flux through glycolysis and  
54 indirectly affect intracellular succinate production rather than its release. To control for  
55 this potentially confounding factor, we supplied retinas with 5 mM <sup>12</sup>C-glucose and 50  
56 μM <sup>13</sup>C-malate in all experiments testing the role of MCTs in succinate export in this

57 section (**Figure 1C**). Including this tracer quantity of  $^{13}\text{C}$ -malate allows for quantification  
58 of succinate produced both by oxidative (m0 succinate) and by reductive (m4 succinate)  
59 TCA cycle activity.<sup>1</sup> m4 succinate production does not depend on acetyl-CoA  
60 availability, so by monitoring rates of both m0 and m4 succinate export, we can attribute  
61 a decrease in succinate export to specific inhibition of MCT-mediated succinate  
62 transport, not just a change in intracellular succinate production.

63  
64 MCT-dependent substrate transport depends on pH because it transports protons along  
65 with each anionic substrate. Lowering pH on the *trans* (in this case extracellular) side of  
66 a MCT decreases its ability to export anions, as it must now transport protons against a  
67 concentration gradient (**Figure 1D**). We measured succinate export in retinas incubated  
68 in medium adjusted to pH 7.4 or 6.5 and observed that lower extracellular pH reduced  
69 export of m0 and m4 succinate, as well as the canonical MCT substrates lactate and  
70 pyruvate (**Figure 1E**). We treated retinas incubated in pH 7.4 medium with  $\text{H}^+$   
71 ionophores (the  $\text{H}^+/\text{Na}^+$  ionophore monensin or the  $\text{H}^+/\text{K}^+$  ionophore nigericin) to  
72 diminish any proton gradient that may normally drive MCT-mediated export in retinas.  
73 Rates of m0 lactate, m0 pyruvate, m0 succinate, and m4 succinate export all were  
74 diminished by the ionophores (**Figure 1F**).

75  
76  
77  
78  
79  
80  
81  
82  
83  
84  
85

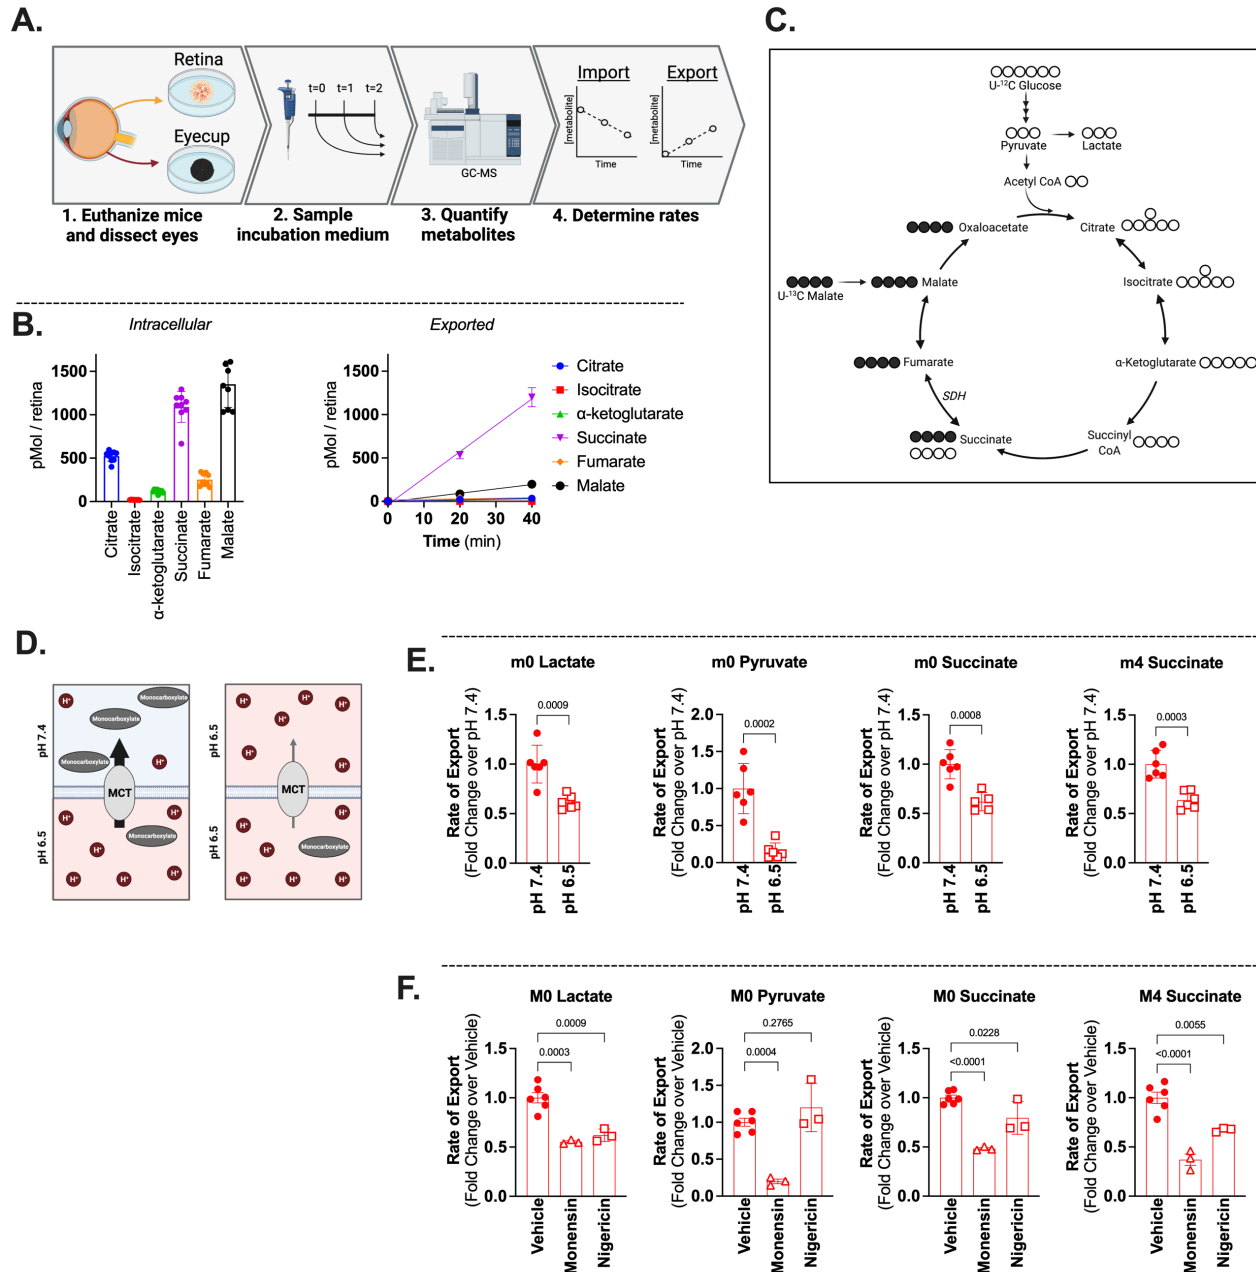

**Figure 1: H<sup>+</sup> dependence of succinate export in retinas**

**(A)** Experimental workflow for determination of metabolite export and import rates. **(B)** Diagram showing the isotopologues of succinate which are made by oxidative metabolism of U-<sup>12</sup>C-glucose and U-<sup>13</sup>C-succinate. Open circles represent <sup>12</sup>C, filled circles represent <sup>13</sup>C. **(C)** Intracellular levels of TCA cycle metabolites from freshly dissected retinas (left, n = 9) and rate at which they are exported when retinas are incubated in 5 mM glucose (right, n = 6). **(D)** Representation of how pH gradients can influence MCT activity. **(E)** Rate of export of the canonical MCT substrate m0 lactate and m0 pyruvate, as well as m0 succinate and m4 succinate from retinas incubated in 5 mM <sup>12</sup>C-glucose and 50 μM <sup>13</sup>C-malate. p-values determined using Welch's t test (n = 6 retinas). **(F)** Rate of export of m0 lactate, m0 pyruvate, m0 succinate, and m4 succinate from retinas in the presence of 100 μM monensin or 100 μM nigericin. p-values determined using a one-way ANOVA (n = (6, vehicle) (3, monensin) (3, nigericin)).

87 We next tested several MCT isoform-specific inhibitors to determine if we could identify  
88 which specific MCT(s) facilitate succinate export in retinas (**Table 1**). The dual  
89 MCT1/MCT2 inhibitors AR-C155858 or AZD3965 (**Figure 2A** and **Figure 2B**) slow m0  
90 and m4 succinate export in a dose-dependent manner. These effects are likely  
91 mediated through inhibition of MCT1, since MCT2 appears either to not be expressed or  
92 to be expressed only at very low levels in the retina.<sup>9-11</sup> The dual MCT1/MCT4 inhibitor  
93 diclofenac (**Figure 2C**) also slows both m0 and m4 succinate export. It is possible that  
94 the increased effectiveness of diclofenac relative to the dual MCT1/MCT2 inhibitors is  
95 due to inhibition of MCT4 in addition to MCT1. However, in cultured myotubules  
96 expressing MCTs 1, 2, and 4, reducing MCT4 expression did not alter succinate  
97 export.<sup>5</sup> Since diclofenac is structurally distinct from AZD3965 and AR-C155858, its  
98 increased effectiveness could also be due to an altered mechanism of action or  
99 increased permeability. As a result, these experiments show that MCT1 is responsible  
100 for a portion of succinate export in retinas and MCT4 may transport a portion of  
101 succinate in retinas.

| Inhibitor   | <i>MCT1</i>                 | <i>MCT2</i>             | <i>MCT3</i>   | <i>MCT4</i>                 | references |
|-------------|-----------------------------|-------------------------|---------------|-----------------------------|------------|
| AZD3965     | 3.2 nM (K <sub>i</sub> )    | 20 nM (K <sub>i</sub> ) | No Inhibition | No inhibition*              | 16         |
| AR-C155858  | 2.3 nM (K <sub>i</sub> )    | 10 nM                   | n.d.          | Minimal inhibition †        | 18         |
| Diclofenac‡ | 1.45 μM (IC <sub>50</sub> ) | n.d.                    | n.d.          | 0.14 μM (IC <sub>50</sub> ) | 19,32      |

**Table 1: Reported kinetic parameters for various MCT inhibitors**

“n.d.” indicates no data for the effectiveness of an inhibitor for that MCT has been reported.

\*no inhibition observed up to 10 μM

†no inhibition observed up to 1 μM, some inhibition observed at 10 μM

‡ The K<sub>i</sub> for diclofenac in a mixed population of MCT1, MCT2, and MCT4 is 20 μM

102

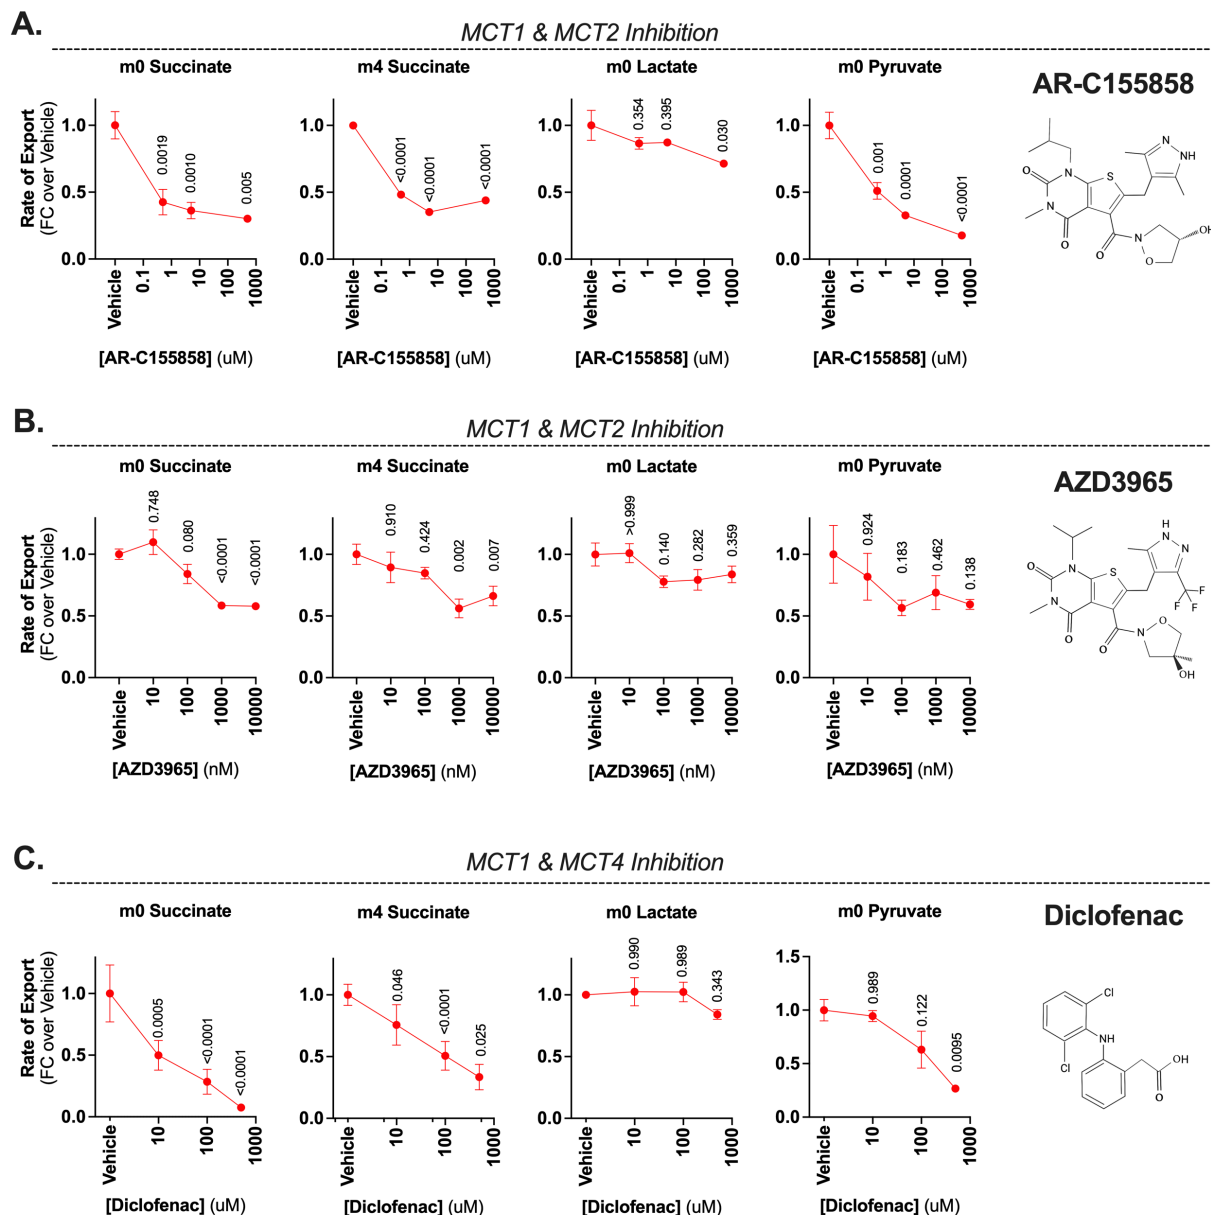

103

104

**Figure 2: Effect of MCT inhibition on succinate export in retinas.**

(A,B,C) Influences of various MCT inhibitors on retinal export of m0 succinate, m4 succinate, m0 lactate and m0 pyruvate. Rates determined by sampling incubation media from retinas incubated in 5 mM  $^{12}\text{C}$ -glucose and 50  $\mu\text{M}$   $^{13}\text{C}$ -malate. P-values shown above each point were calculated using an ordinary one-way ANOVA (all conditions compared to vehicle) followed by Dunnett's correction for multiple comparisons. (A) AR-C155858 (n = (3, 0 nM) (3, 500 nM) (3, 5  $\mu\text{M}$ ) (3, 500  $\mu\text{M}$ )). (B) AZD3965 (n = (9, 0 nM) (3, 10 nM) (9, 100 nM) (6, 1  $\mu\text{M}$ ) (9, 10  $\mu\text{M}$ )). (C) Diclofenac (n = (6, 0 nM) (3, 10  $\mu\text{M}$ ) (6, 100  $\mu\text{M}$ ) (3, 500  $\mu\text{M}$ )).

105

106

## 107 **Eyecup succinate import is not MCT mediated**

108

109 Unlike retina tissue, eyecup explants do not export succinate and instead measurably  
110 deplete it from the incubation (**Figure 3A**).<sup>1,2</sup> Eyecup tissue is composed of sclera,  
111 choroidal endothelial cells, and RPE cells. MCT expression on RPE cells is polarized,  
112 with MCT3 localized to the basal RPE surface and robust MCT1 expression on the  
113 apical processes.<sup>8,10,12</sup> Because apical processes are in direct contact with the  
114 succinate-exporting retina, we hypothesized that MCT1 may be responsible for both  
115 retina succinate export and RPE succinate import.

116

117 We first tested if MCT1 is responsible for eyecup succinate import by measuring import  
118 of 50  $\mu\text{M}$  U-<sup>13</sup>C-succinate from pH 7.4 incubation medium in the presence of the MCT1  
119 inhibitor AZD3965 (**Figure 3B**). AZD3965 suppressed lactate export but did not inhibit  
120 succinate import. However, it is possible that MCT3 maintains succinate uptake when  
121 MCT1 is inhibited. We were unable to identify a well-characterized MCT3 inhibitor, so  
122 we tested if we could outcompete U-<sup>13</sup>C-succinate import with an excess of lactate and  
123 pyruvate (substrates for both MCT1 and MCT3 which would act as competitive  
124 inhibitors) (**Figure 3C**). Lactate and pyruvate did not alter the rate of succinate import.

125

126 We next considered that eyecups could express a high-affinity, non-MCT succinate  
127 transporter, and that MCTs might only become engaged in succinate import under  
128 specific conditions (such as when pH is low and/or when extracellular succinate  
129 concentrations are higher). Lowering pH in *cis* with succinate could modulate MCT-  
130 mediated succinate transport in two ways: (1) as shown previously in **Figure 1D**, a high  
131 proton gradient can drive transport, and (2) at acidic pH, a greater fraction of succinate  
132 exists as a MCT-transportable monocarboxylate (**Figure 3D**).<sup>5</sup> With this in mind, we  
133 tested if we could engage measurable MCT-mediated succinate import in eyecups by  
134 acidifying the extracellular pH and increasing the extracellular succinate concentration  
135 (**Figure 3E**). As expected, the rates of lactate and pyruvate export decreased as  
136 extracellular pH was acidified and MCTs began to export these substrates against an  
137 increasingly steep proton gradient. However, the rate of succinate import also

138 decreased as pH acidified, indicating that the steeper proton gradient was ineffective at  
 139 enhancing succinate import.

140

141 It is possible that low pH suppresses mitochondrial succinate oxidation, and that an  
 142 increase in MCT-mediated succinate transport is masked by a decrease in succinate  
 143 oxidation at acidic pH. To control for this, we tested if the MCT substrates lactate and  
 144 pyruvate might be able to outcompete a greater fraction of succinate uptake as pH  
 145 acidified (**Figure 3E**). Even at the lowest pH, lactate and pyruvate had no significant  
 146 influence on succinate import. This indicates that an unidentified succinate transporter  
 147 and not MCT1 or MCT3 is the primary succinate importer in eyecups.

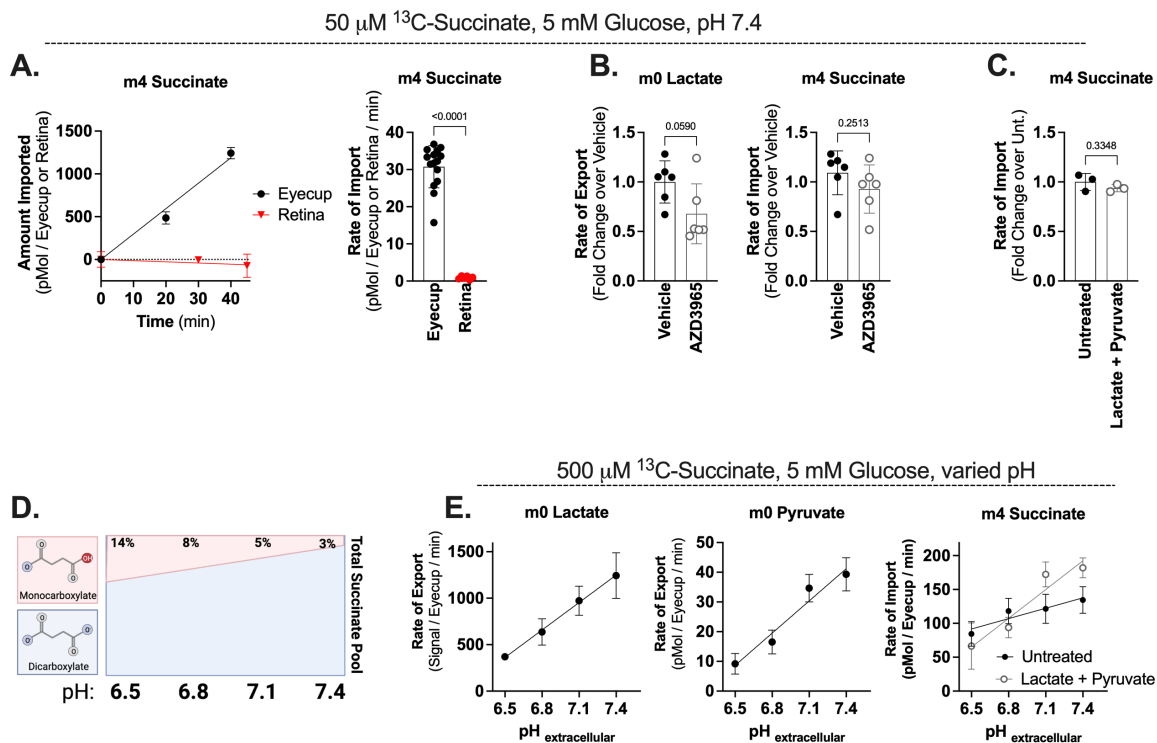

### Figure 3: MCTs do not import succinate in eyecups

(A) Depletion of succinate from the incubation media by eyecups (n=14) and retinas (n=6) incubated in 5 mM  $^{12}$ C-glucose and 50  $\mu$ M  $^{13}$ C-succinate. Linearity of import over time is shown on the left, calculated rates of import shown on the right. (B) Rates of lactate export and succinate import in the presence of 100  $\mu$ M AZD3965. p-value determined by a two-tailed Welch's t-test (n=6 eyecups for each condition). (C) Rate of succinate import in the presence of 15 mM Lactate and 1 mM Pyruvate. P-value determined by a two-tailed Welch's t-test (n=3 eyecups for each condition). Exogenous lactate and pyruvate prevent determination of the rates of lactate or pyruvate export in this experiment. (D) Graphical representation of how pH can influence the fraction of monocarboxylate succinate. The ratio of monocarboxylate:dicarboxylate succinate was determined using the Henderson-Hasselbalch equation and a pKa of 5.69. (E) Rate of succinate import by eyecups supplied with 5 mM  $^{12}$ C-glucose and 500  $\mu$ M  $^{13}$ C-succinate, in the presence or absence of 15 mM lactate and 1 mM pyruvate. (n=6 untreated eyecups at each pH, 3 lactate + pyruvate eyecups at each pH).



## 148 **Eyecups can be induced to export succinate via MCT1**

149

150 Although both retina and eyecup express MCT1, retinal explants export succinate while  
151 eyecup explants do not. In fact, MCT1 can be found on red skeletal muscle, cardiac  
152 muscle, red blood cells, liver, kidney cortex and tubule cells, adipose tissue, cerebral  
153 neurons and glia, and pancreatic acinar cells, but retina and pancreas are the only  
154 tissues reported to date that export succinate under basal conditions<sup>8,9,13,14</sup>. We next  
155 sought to determine if we could identify a metabolic difference between MCT1-  
156 expressing tissues in the eye which causes succinate export to become engaged.

157

158 In other tissues that can be induced to export succinate (such as exercising muscle or  
159 ischemic heart tissue), succinate export is accompanied by a rise in intracellular  
160 succinate levels and intracellular acidification.<sup>5,6,15</sup> We compared intracellular succinate  
161 levels between retina and eyecup tissue and saw that retinas contain approximately 20-  
162 fold more succinate per  $\mu\text{g}$  protein compared to eyecups (**Figure 4A**).

163

164 To test if increasing eyecup succinate levels were sufficient to induce succinate export,  
165 we treated eyecups with the SDH inhibitor malonate and observed a dose-dependent  
166 increase in intracellular succinate levels (**Figure 4B** and **4C**). When we sampled  
167 incubation media from retinas incubated with malonate, we observed that eyecups  
168 stopped importing exogenous succinate (m4) and began to export endogenous  
169 succinate (m0) (**Figure 4D**). This succinate export was effectively shut down by the  
170 MCT1 inhibitors AZD3965 and diclofenac (**Figure 4D**). The nearly complete inhibition of  
171 malonate-induced m0 succinate export by AZD3965 in eyecups indicates that MCT3 is  
172 unable to transport succinate, since AZD3965 has no inhibitory effect on MCT3 even  
173 well above the concentration we used.<sup>16</sup> Taken together, these results show that a high  
174 intracellular succinate concentration is at least one contributing factor that contributes to  
175 a tissue exporting succinate through MCT1 (**Figure 4B**).

176

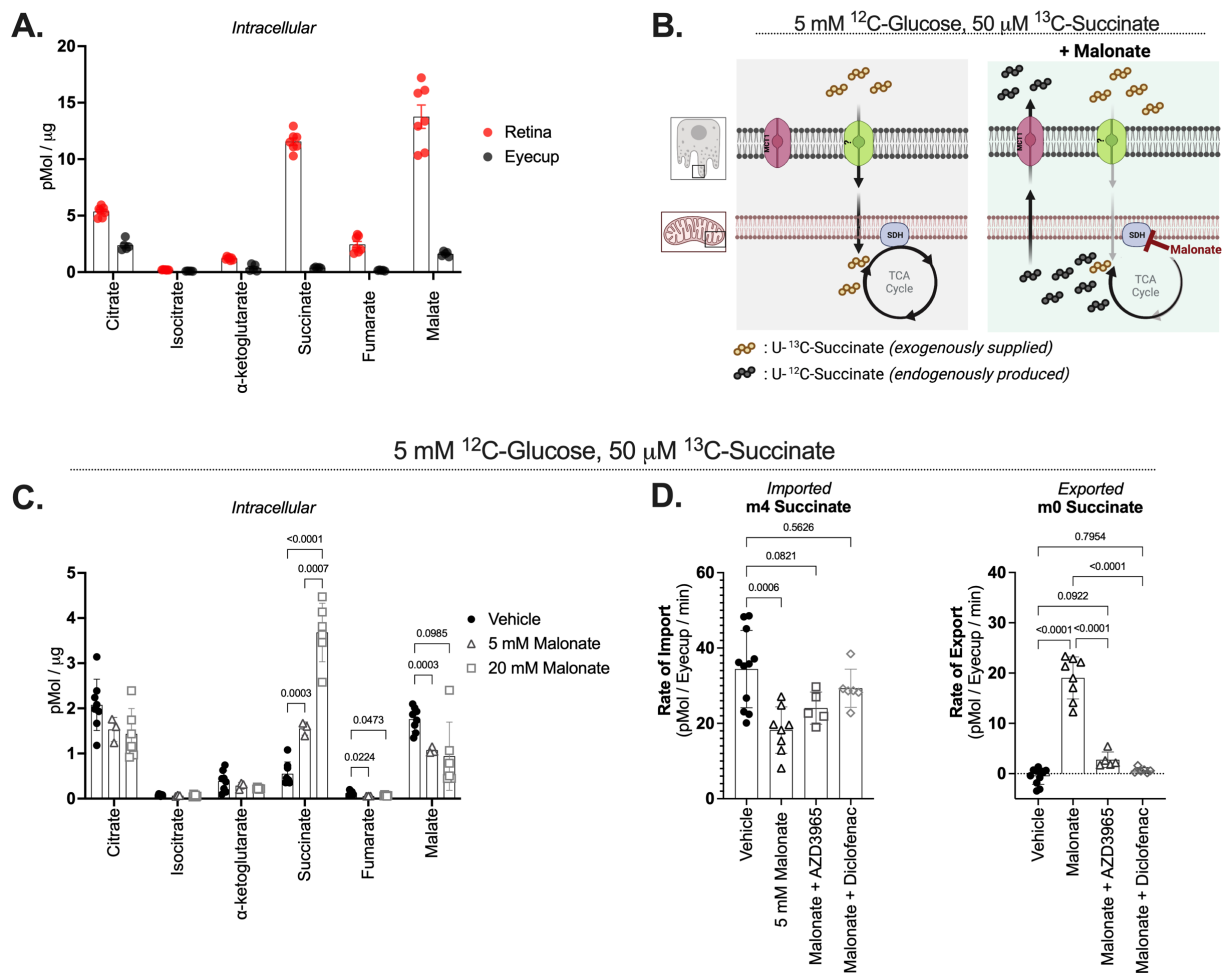

#### Figure 4: Eyecups can be induced to export succinate via MCT1

(A) Total intracellular metabolites per  $\mu\text{g}$  dry protein in freshly dissected retinas and eyecups ( $n=7$  retinas and 5 eyecups). (B) Influences of malonate on succinate dynamics in eyecups. (C) Intracellular metabolite levels per  $\mu\text{g}$  dry tissue in eyecups incubated in 0, 5, or 20 mM malonate for 40 minutes. P-values determined using an ordinary one-way ANOVA followed by Dunnett's correction for multiple comparisons. ( $n = (8, \text{Vehicle}) (3, 5 \text{ mM}) (6, 20 \text{ mM})$ ). (D) Rates of m4 succinate import and m0 succinate export from eyecups incubated with 5 mM malonate, 5 mM malonate + 100 nM AZD3965, or 5 mM malonate + 100  $\mu\text{M}$  diclofenac. P-values determined using a one-way ANOVA followed by Dunnett's correction for multiple comparisons. ( $n = (11, \text{vehicle}) (8, \text{malonate}) (5, \text{malonate} + \text{AZD3965}) (6, \text{malonate} + \text{diclofenac})$ ).

177

178

179

180

181

182

183

184 **Discussion**

185

186 The goal of this study was to understand how succinate is transported between cells in  
187 an eye. Our results indicate that MCT1 can be added to the model of succinate transit in  
188 the retinal ecosystem as the retinal succinate exporter, but not as the RPE succinate  
189 importer.

190

191 MCT inhibitors are ineffective at reducing lactate export in retinas. The MCT1/2 inhibitor  
192 AZD3965 is a competitive inhibitor, so its increased effectiveness at reducing pyruvate  
193 export relative to lactate export could be due in part to the exceptionally high  
194 intracellular lactate levels in photoreceptors.<sup>17</sup> The MCT1/2 inhibitor AR-C155858 and  
195 the MCT1/4 inhibitor diclofenac both appear to be non-competitive inhibitors and so  
196 their effectiveness should not depend on lactate concentration.<sup>18,19</sup> Consistent with this,  
197 AR-C155858 exhibited the best dose-dependent inhibition of lactate efflux, although  
198 pyruvate efflux was still more strongly inhibited. Non-ionic diffusion of the free acid form  
199 of lactate across the plasma membrane could be responsible for a portion of the  
200 sustained lactate export in the presence of MCT inhibitors. The free diffusion of lactate  
201 is reported to be faster than that of pyruvate, and retinas have the high intracellular  
202 lactate concentrations required to drive this process.<sup>20–22</sup> Retinas may also express an  
203 inhibitor-insensitive transporter capable of facilitating lactate export in the absence of  
204 MCT function.

205

206 Determining why MCT1 plays no significant role in importing succinate under  
207 physiological *ex vivo* conditions in both retinas and eyecups is important to  
208 understanding the biological implications of circulating succinate. The current  
209 understanding of MCT activity states that at equilibrium, there will be a balance between  
210 the  $[H^+]_{out}$ ,  $[monocarboxylate]_{out}$  and  $[H^+]_{in}$ ,  $[monocarboxylate]_{in}$ .<sup>23</sup> A recent report has  
211 illustrated the added influence pH has on modulating the amount of MCT-transportable  
212 succinate due to its physiologically relevant pKa (**Figure 3D**).<sup>5</sup> Based off this, we  
213 reasoned that we might detect MCT1-mediated succinate import in eyecups if we  
214 enhanced it by lowering the extracellular pH and supplying a higher concentration of

215 extracellular succinate (**Figure 3E**). However, this did not enhance succinate import.  
216 Perhaps an unidentified succinate importer has a significantly higher affinity for  
217 succinate than MCT1 does, and import of succinate into eyecups may not be the rate  
218 limiting step for overall succinate oxidation. In this scenario, any change to the small  
219 amount of succinate that could be imported by MCT1 would not affect the overall  
220 process of succinate depletion and thus we would not be able to detect it in our assay.

221  
222 Even though retinas express copious MCT1, they appear to be incapable of using it as  
223 a succinate importer. Retinas incubated in U-<sup>13</sup>C-succinate do not deplete measurable  
224 amounts from the media (**Figure 3A**) and intracellular downstream intermediates are  
225 <sup>13</sup>C-labeled by succinate only to a minor degree.<sup>1,24</sup> Since a small fraction of  
226 downstream intermediates can be labeled by exogenous succinate in retinas, MCT1  
227 may be able to import a small amount of succinate. However, since supplying retinas  
228 with as much as 100 mM succinate does not stimulate significant O<sub>2</sub> consumption, it is  
229 unlikely that the small amount of MCT1-mediated succinate import in retinas is  
230 biologically relevant.<sup>2</sup>

231  
232 Considering that for a MCT at equilibrium  $[H^+]_{out}, [monocarboxylate]_{out} = [H^+]_{in},$   
233  $[monocarboxylate]_{in},$  the likely explanation for the observed unidirectional MCT1 activity  
234 in retinas is that they have both high intracellular succinate levels (**Figure 4A**) and an  
235 unusually acidified cytosol. *In vivo* pH measurements made from a cat eye report the pH  
236 of the retina to be ~7.1, while the pH of the choroid (near the RPE) was ~7.4.<sup>25</sup> A retina  
237 maintains an unusually high rate of aerobic glycolysis relative to the RPE (and most  
238 other tissues), which likely contributes to retinal acidification.<sup>26,27</sup> The retina also  
239 produces succinate via both oxidative TCA cycle activity and reduction of fumarate,  
240 which could contribute to maintaining high intracellular succinate levels.<sup>1</sup> This may  
241 explain why most MCT1-expressing tissues do not export succinate under basal  
242 conditions. Since most tissues do not rely on aerobic glycolysis and fumarate respiration  
243 to the same extent that the retina does, they lack the requisite acidified cytosol and high  
244 intracellular succinate levels required to engage MCT1-mediated succinate transport.

245

246 Like healthy retina tissue, MCT1 overexpressing cancers also rely on aerobic glycolysis  
247 and convert a large fraction of the glucose they consume to lactate.<sup>28</sup> Succinate has  
248 recently been identified as a metabolite exported by cancer cells and that promotes  
249 metastatic activity through SUCNR1 signaling.<sup>29</sup> Determining if this succinate also is  
250 exported is via MCT1 will allow it to be targeted for inhibition by existing MCT1-specific  
251 chemotherapy drugs.

252

253 By identifying the retinal succinate exporter, we hoped we would be able to harness it to  
254 study the role of succinate exchange in the retinal ecosystem by enhancing or  
255 decreasing its expression. Unfortunately, the canonical role of MCT1 as a lactate and  
256 pyruvate transporter is fundamental to retinal health and it would be difficult to parse  
257 any succinate-specific phenotype from disruptions caused by inhibition of lactate and  
258 pyruvate transport. However, this general strategy may still be pursued once the RPE  
259 succinate importer has been identified.

260

## 261 **Methods**

262

263 **Animals:** All experiments used 2-6 month-old male and female wild-type C57BL6/J  
264 mice, either obtained from Jackson Labs or bred in house. These mice were housed at  
265 the SLU 3.1 facility at an ambient temperature of 25°C, with a 12-hour light cycle and ad  
266 libitum access to water and normal rodent chow. Experiments using animals conform to  
267 the ARVO guidelines for the use of animals in ophthalmic research.

268 **Ex vivo metabolite uptake/export:** In all *ex vivo* metabolic analysis experiments, mice  
269 were euthanized by awake cervical dislocation and retinas and/or eyecups were  
270 dissected in Hank's Buffered Salt Solution (HBSS; GIBCO, Cat#: 14025-076). Tissue  
271 was incubated in Krebs-Ringer buffer (formulations used in each figure specified below  
272 below) supplemented with 5 mM glucose and [U-<sup>13</sup>C]-succinic acid (Cambridge isotope  
273 CLM-1571-0.1) or [U-<sup>13</sup>C]-malate (Cambridge isotope CLM-8065) as indicated in each  
274 figure. For experiments using KRB buffer, buffer was pre-equilibrated at 37°C, 21% O<sub>2</sub>,  
275 and 5% CO<sub>2</sub> prior to incubations and incubations were carried out at those conditions.  
276 For experiments where pH was modulated KRM buffer was used, buffer was pre-

277 equilibrated at 37°C and room oxygen and incubations were carried out under those  
278 conditions. For determination of metabolite import or export rates, incubation media was  
279 sampled at 3 timepoints (typically 0, 20, and 40 minutes) and export or import was  
280 confirmed to be linear over time. Retinas were incubated in 200 µL and eyecups in 100  
281 µL over this range of time. Inhibitors used were AZD3965 (Cayman Chemical no.  
282 19912), AR-C155858 (MedChemExpress HY-13248), diclofenac sodium salt (Cayman  
283 Chemical no. 70680). Ethanol was used as a solvent for AZD3965, DMSO was used as  
284 a solvent for AR-C155858, and separate experiments were done using both DMSO and  
285 ethanol as a solvent for diclofenac.

286 **Buffer formulations used:** Krebs-Ringer Bicarbonate (KRB) buffer was used in all  
287 experiments except for Figures 1E and 3E: (98.5 mM NaCl, 5.1 mM KCl, 1.2 mM  
288 KH<sub>2</sub>PO<sub>4</sub>, 1.2 mM MgSO<sub>4</sub>·7H<sub>2</sub>O, 2.7 mM CaCl<sub>2</sub>·2H<sub>2</sub>O, 20.8 mM HEPES, and 25.9 mM  
289 NaHCO<sub>3</sub>). Krebs-Ringer MOPS (KRM) buffer was used in Figures 1E and 3E: (98.5 mM  
290 NaCl, 5.1 mM KCl, 1.2 mM KH<sub>2</sub>PO<sub>4</sub>, 1.2 mM MgSO<sub>4</sub>·7H<sub>2</sub>O, 2.7 mM CaCl<sub>2</sub>·2H<sub>2</sub>O, 10  
291 mM HEPES, and 15 mM MOPS). KRB buffer equilibrates to pH 7.4 at 37°C in a 5%  
292 CO<sub>2</sub> incubator. KRM buffer was adjusted to the desired pH using HCl at 37°C in room  
293 O<sub>2</sub>.

294 **Metabolite Extraction:** Media samples were added directly to 90% MeOH  
295 supplemented with 10 µM methylsuccinate and immediately lyophilized. Dried samples  
296 were stored at -80°C until derivatization. Metabolites were extracted from retina or  
297 eyecup tissue using 150 µL ice-cold 80% MeOH, 20% H<sub>2</sub>O supplemented with 10 µM  
298 methylsuccinate (Sigma, M81209) as an internal standard to adjust for any metabolite  
299 loss during the extraction and derivatization procedures. Tissues were disrupted by  
300 sonication and incubated on dry ice for 45 minutes to precipitate protein. Protein and  
301 cell debris was pelleted at 17,000 x g for 30 minutes at 4°C. The supernatant containing  
302 metabolites was lyophilized at room-temperature until dry and stored at -80°C until  
303 derivatization. The protein pellet was resuspended by sonication in RIPA buffer (150  
304 mM NaCl, 1.0% Triton X-100, 0.5% sodium deoxycholate, 0.1% SDS, 50 mM Tris, pH  
305 8.0) and the amount of protein was determined by a BCA assay (ThermoFisher, 23225).

306 **Metabolite Derivatization:** Lyophilized samples were first derivatized in 10 µL of 20  
307 mg/mL methoxyamine HCl (Sigma, Cat#: 226904) dissolved in pyridine (Sigma, Cat#:

308 270970) at 37°C for 90 minutes, and subsequently with 10 µL tert-butyldimethylsilyl-N-  
309 methyltrifluoroacetamide (Sigma, Cat#: 394882) at 70°C for 90 minutes.

310 **Gas Chromatography-Mass Spectrometry:** Metabolites were analyzed on an Agilent  
311 7890/5975C GC-MS using selected-ion monitoring methods described in previous  
312 work.<sup>30</sup> Peaks were integrated in MSD ChemStation (Agilent), and correction for natural  
313 isotope abundance was performed using IsoCor software.<sup>31</sup> Corrected metabolite  
314 signals were converted to molar amounts by comparing metabolite peak abundances in  
315 samples with those in a standard mix (which was prepared to contain known quantities  
316 of metabolites and run along each individual experiment). These known metabolite  
317 concentrations were used to generate a standard curve which allowed for metabolite  
318 quantification.

319 **Statistical Analysis:** Statistical tests were performed in GraphPad Prism v9. The test  
320 used is indicated in each figure. Briefly, Welch's t-test was used in instances where two  
321 groups were compared, and an ordinary one-way ANOVA followed by the  
322 recommended correction for multiple comparison was used when multiple conditions  
323 where compared. "n" is indicated in each figure legend and represents biological  
324 replicates (i.e. n = 3 indicates that 3 rate measurements were obtained from 3 different  
325 retinas, rather than 3 rate measurements made from the same retina). Retinas and  
326 eyecups from the same mouse were always used in different experimental conditions  
327 and thus were considered biological replicates.

328

### 329 **Acknowledgements**

330 The authors who contributed to this work are CMB, DTH, and JBH. CMB conceptualized  
331 the work with helpful discussions from JBH and DTH. CMB performed the experiments,  
332 analyzed the data, and prepared the manuscript. JBH and DTH assisted with editing the  
333 manuscript. We thank Martin Sadilek (UW Chemistry) for assistance with maintaining  
334 GC-MS instrumentation and methods, and Whitney Cleghorn and Marcos Nazario for  
335 mouse colony maintenance. Funding was provided by F31EY031165 (CMB),  
336 5T32EY007031-42 (DTH), and EY06641 and EY017863 (JBH).

337

338

## 339 References

340

- 341 1. Bisbach CM, Hass DT, Robbins BM, et al. Succinate Can Shuttle Reducing  
342 Power from the Hypoxic Retina to the O<sub>2</sub>-Rich Pigment Epithelium. *Cell Rep.*  
343 2020;31(5):107606. doi:10.1016/j.celrep.2020.107606
- 344 2. Hass DT, Bisbach CM, Robbins BM, Sweet IR, Hurley JB. Succinate metabolism  
345 uncouples retinal pigment epithelium mitochondria. *bioRxiv.* 2021:1-12.  
346 doi:<https://doi.org/10.1101/2021.02.10.430650>
- 347 3. Sapieha P, Sirinyan M, Hamel D, et al. The succinate receptor GPR91 in neurons  
348 has a major role in retinal angiogenesis. *Nat Med.* 2008;14(10):1067-1076.  
349 doi:10.1038/nm.1873
- 350 4. Favret S, Binet F, Lapalme E, et al. Deficiency in the metabolite receptor  
351 SUCNR1 (GPR91) leads to outer retinal lesions. *Aging (Albany NY).*  
352 2013;5(6):427-444. doi:10.18632/aging.100563
- 353 5. Reddy A, Bozi LHM, Yaghi OK, et al. pH-Gated Succinate Secretion Regulates  
354 Muscle Remodeling in Response to Exercise. *Cell.* 2020;183(1):62-75.e17.  
355 doi:10.1016/j.cell.2020.08.039
- 356 6. Prag HA, Gruszczuk A V, Huang MM, et al. Mechanism of succinate efflux upon  
357 reperfusion of the ischaemic heart. *Cardiovasc Res.* 2020.  
358 doi:10.1093/cvr/cvaa148
- 359 7. Han JYS, Kinoshita J, Bisetto S, et al. Role of monocarboxylate transporters in  
360 regulating metabolic homeostasis in the outer retina: Insight gained from cell-  
361 specific Bsg deletion. *FASEB J.* 2020;34(4):5401-5419.  
362 doi:10.1096/fj.201902961R
- 363 8. Adijanto J, Philp NJ. *The SLC16A Family of Monocarboxylate Transporters*  
364 *(MCTs)-Physiology and Function in Cellular Metabolism, PH Homeostasis, and*  
365 *Fluid Transport.* Vol 70. Elsevier; 2012. doi:10.1016/B978-0-12-394316-3.00009-0
- 366 9. Zhao C, Wilson MC, Schuit F, Halestrap AP, Rutter GA. Expression and  
367 distribution of lactate/monocarboxylate transporter isoforms in pancreatic islets  
368 and the exocrine pancreas. *Diabetes.* 2001;50(2):361-366.  
369 doi:10.2337/diabetes.50.2.361



- 370 10. Philp NJ, Ochrietor JD, Rudoy C, Muramatsu T, Linser PJ. Loss of MCT1, MCT3,  
371 and MCT4 expression in the retinal pigment epithelium and neural retina of the  
372 5A11/basigin-null mouse. *Investig Ophthalmol Vis Sci*. 2003;44(3):1305-1311.  
373 doi:10.1167/iovs.02-0552
- 374 11. Voigt AP, Whitmore SS, Lessing ND, et al. Spectacle: An interactive resource for  
375 ocular single-cell RNA sequencing data analysis. *Exp Eye Res*.  
376 2020;200(September):108204. doi:10.1016/j.exer.2020.108204
- 377 12. Philp NJ, Yoon H, Lombardi L. Mouse MCT3 gene is expressed preferentially in  
378 retinal pigment and choroid plexus epithelia. *Am J Physiol - Cell Physiol*.  
379 2001;280(5 49-5):1319-1326. doi:10.1152/ajpcell.2001.280.5.c1319
- 380 13. Halestrap AP. Monocarboxylic Acid Transport. *Compr Physiol*. 2013;3(4):1611-  
381 1643. doi:10.1002/cphy.c130008
- 382 14. Jang C, Hui S, Zeng X, et al. Metabolite Exchange between Mammalian Organs  
383 Quantified in Pigs. *Cell Metab*. 2019;30(3):594-606.e3.  
384 doi:10.1016/j.cmet.2019.06.002
- 385 15. Chouchani ET, Pell VR, Gaude E, et al. Ischaemic accumulation of succinate  
386 controls reperfusion injury through mitochondrial ROS. *Nature*.  
387 2014;515(7527):431-435. doi:10.1038/nature13909
- 388 16. Curtis NJ, Mooney L, Hopcroft L, et al. Pre-clinical pharmacology of AZD3965, a  
389 selective inhibitor of MCT1: DLBCL, NHL and Burkitt's lymphoma anti-tumor  
390 activity. *Oncotarget*. 2017;8(41):69219-69236. doi:10.18632/oncotarget.18215
- 391 17. Wang N, Jiang X, Zhang S, et al. Structural basis of human monocarboxylate  
392 transporter 1 inhibition by anti-cancer drug candidates. *Cell*. 2021;184(2):370-  
393 383.e13. doi:10.1016/j.cell.2020.11.043
- 394 18. Ovens MJ, Davies AJ, Wilson MC, Murray CM, Halestrap AP. AR-C155858 is a  
395 potent inhibitor of monocarboxylate transporters MCT1 and MCT2 that binds to an  
396 intracellular site involving transmembrane helices 7-10. *Biochem J*.  
397 2010;425(3):523-530. doi:10.1042/BJ20091515
- 398 19. Sasaki S, Futagi Y, Ideno M, et al. Effect of diclofenac on SLC16A3/MCT4 by the  
399 Caco-2 cell line. *Drug Metab Pharmacokinet*. 2016;31(3):218-223.  
400 doi:10.1016/j.dmpk.2016.03.004

- 401 20. Poole RC, Halestrap AP. Transport of lactate and other monocarboxylates across  
402 mammalian plasma membranes. *Am J Physiol - Cell Physiol*. 1993;264(4 33-4).  
403 doi:10.1152/ajpcell.1993.264.4.c761
- 404 21. Deuticke B, Beyer E, Forst B. Discrimination of three parallel pathways of lactate  
405 transport in the human erythrocyte membrane by inhibitors and kinetic properties.  
406 *BBA - Biomembr*. 1982;684(1):96-110. doi:10.1016/0005-2736(82)90053-0
- 407 22. Bakker EP, Van Dam K. The movement of monocarboxylic acids across  
408 phospholipid membranes: evidence for an exchange diffusion between pyruvate  
409 and other monocarboxylate ions. *BBA - Biomembr*. 1974;339(2):285-289.  
410 doi:10.1016/0005-2736(74)90325-3
- 411 23. Halestrap AP. The monocarboxylate transporter family-Structure and functional  
412 characterization. *IUBMB Life*. 2012;64(1):1-9. doi:10.1002/iub.573
- 413 24. Giarmarco MM, Brock DC, Robbins BM, et al. Daily mitochondrial dynamics in  
414 cone photoreceptors. *Proc Natl Acad Sci U S A*. 2020;117(46):28816-28827.  
415 doi:10.1073/pnas.2007827117
- 416 25. Padnick-Silver L, Linsenmeier RA. Quantification of in vivo anaerobic metabolism  
417 in the normal cat retina through intraretinal pH measurements. *Vis Neurosci*.  
418 2002;19(6):793-806. doi:10.1017/S095252380219609X
- 419 26. Kanow MA, Giarmarco MM, Jankowski CS, et al. Biochemical adaptations of the  
420 retina and retinal pigment epithelium support a metabolic ecosystem in the  
421 vertebrate eye. *Elife*. 2017;6:e28899. doi:10.7554/eLife.28899
- 422 27. Hurley JB, Lindsay KJ, Du J. Glucose, lactate, and shuttling of metabolites in  
423 vertebrate retinas. *J Neurosci Res*. 2015;00(February):n/a-n/a.  
424 doi:10.1002/jnr.23583
- 425 28. Payen VL, Mina E, Van Hée VF, Porporato PE, Sonveaux P. Monocarboxylate  
426 transporters in cancer. *Mol Metab*. 2020;33(July 2019):48-66.  
427 doi:10.1016/j.molmet.2019.07.006
- 428 29. Wu JY, Huang TW, Hsieh YT, et al. Cancer-Derived Succinate Promotes  
429 Macrophage Polarization and Cancer Metastasis via Succinate Receptor. *Mol*  
430 *Cell*. 2020;77(2):213-227.e5. doi:10.1016/j.molcel.2019.10.023
- 431 30. Du J, Linton JD, Hurley JB. *Probing Metabolism in the Intact Retina Using Stable*

- 432            *Isotope Tracers*. Vol 561. 1st ed. Elsevier Inc.; 2015.  
433            doi:10.1016/bs.mie.2015.04.002
- 434 31. Millard P, Letisse F, Sokol S, Portais JC. IsoCor: Correcting MS data in isotope  
435 labeling experiments. *Bioinformatics*. 2012;28(9):1294-1296.  
436            doi:10.1093/bioinformatics/bts127
- 437 32. Renner K, Bruss C, Schnell A, et al. Restricting Glycolysis Preserves T Cell  
438 Effector Functions and Augments Checkpoint Therapy. *Cell Rep*. 2019;29(1):135-  
439 150.e9. doi:10.1016/j.celrep.2019.08.068
- 440
